# Supplementary material for: A β2-agonist sensor based on a molecularly imprinted poly-o-phenylenediamine film on a columnar-structured platinum electrode
Source: Royal Society of Chemistry journal article supplement (doi:10.1039/c3ay42282h), 2014-01-01

**Fig. S1.** DPV of the MIP-PoPD/CSPt without SDS in the electro-polymerization in 1 mM  $[\text{Fe}(\text{CN})_6]^{3-/4-}$  containing 0.1 M KCl after incubation for 15 min in 0.1 M PBS (pH=7.0) containing different concentrations of Meta solution:  $1.11 \times 10^{-7}$ ,  $3.33 \times 10^{-7}$ ,  $7.77 \times 10^{-7}$ ,  $1.33 \times 10^{-6}$ ,  $3.54 \times 10^{-6}$ ,  $6.29 \times 10^{-6}$ ,  $1.08 \times 10^{-5}$  M. The inset shows the relationship between the current and the concentration of Meta. The measurements were conducted immediately after the incubation was completed.

**Fig. S2.** DPV of the MIP-PoPD/CSPt in 1 mM  $[\text{Fe}(\text{CN})_6]^{3-/4-}$  containing 0.1 M KCl after incubation for 15 min in 0.1 M PBS (pH=7.0) containing different concentrations of  $\beta_2$ -agonist solution. The inset shows the relationship between the current and the concentration of  $\beta_2$ -agonist. The measurements were conducted immediately after the incubation was completed

Fig. S1

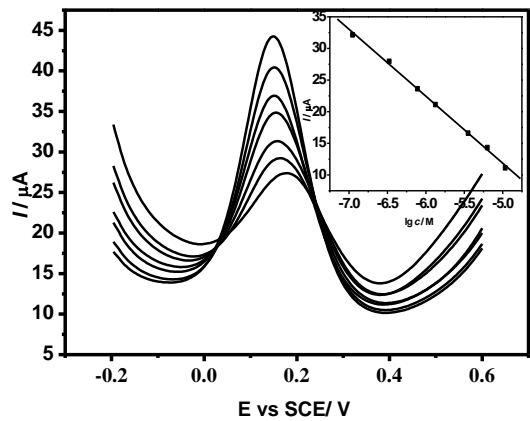

Fig. S2

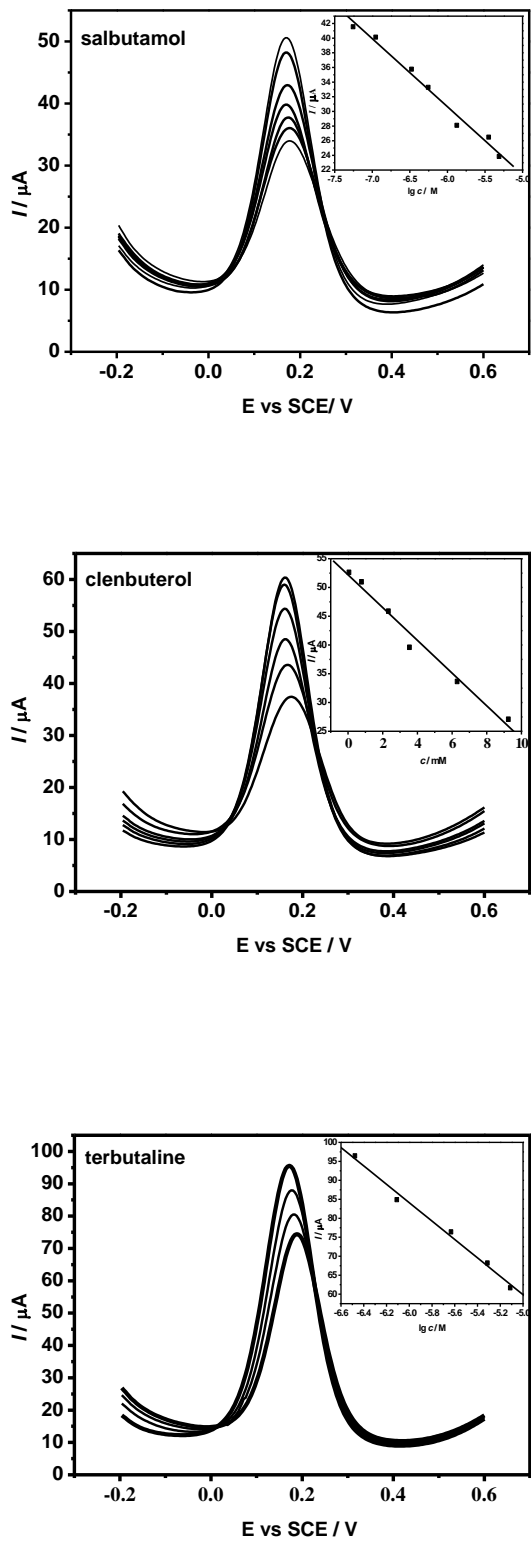

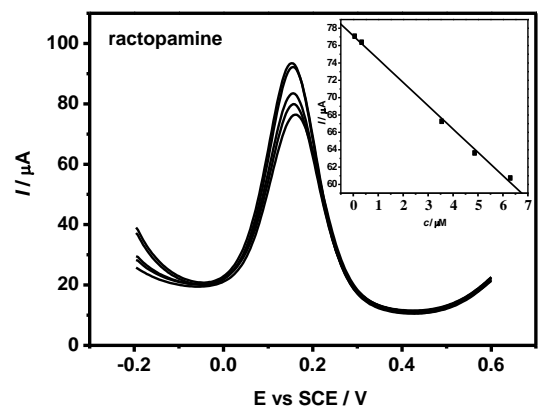

Supplement: c3ay42282h.pdf [file c3ay42282h.pdf]
